# Supplementary material for: Multifunctional lubricant additives derived from natural amino acids and methyl oleate
Source: Royal Society of Chemistry journal article supplement (doi:10.1039/c5ra15239a), 2015-01-01
Supplement: c5ra15239a1.pdf [file c5ra15239a1.pdf]

## **Supporting Information**

### **Multifunctional Lubricant Additives Derived from Natural Amino Acids and Methyl Oleate**

Arukali Sammaiah. Korlipara V. Padmaja. Shiva Shanker Kaki. Rachapudi B.N. Prasad  
Centre for Lipid Research, CSIR-Indian Institute of Chemical Technology, Uppal Road,  
Tarnaka, Hyderabad 500007, India.

#### **Correspondence:**

Dr.R.B.N. Prasad, Centre for Lipid Research, CSIR-Indian Institute of Chemical Technology,  
Uppal Road, Hyderabad 500007, India.

E-mail: [rbnprasad@iict.res.in](mailto:rbnprasad@iict.res.in)

Fax: +91-40-27193370

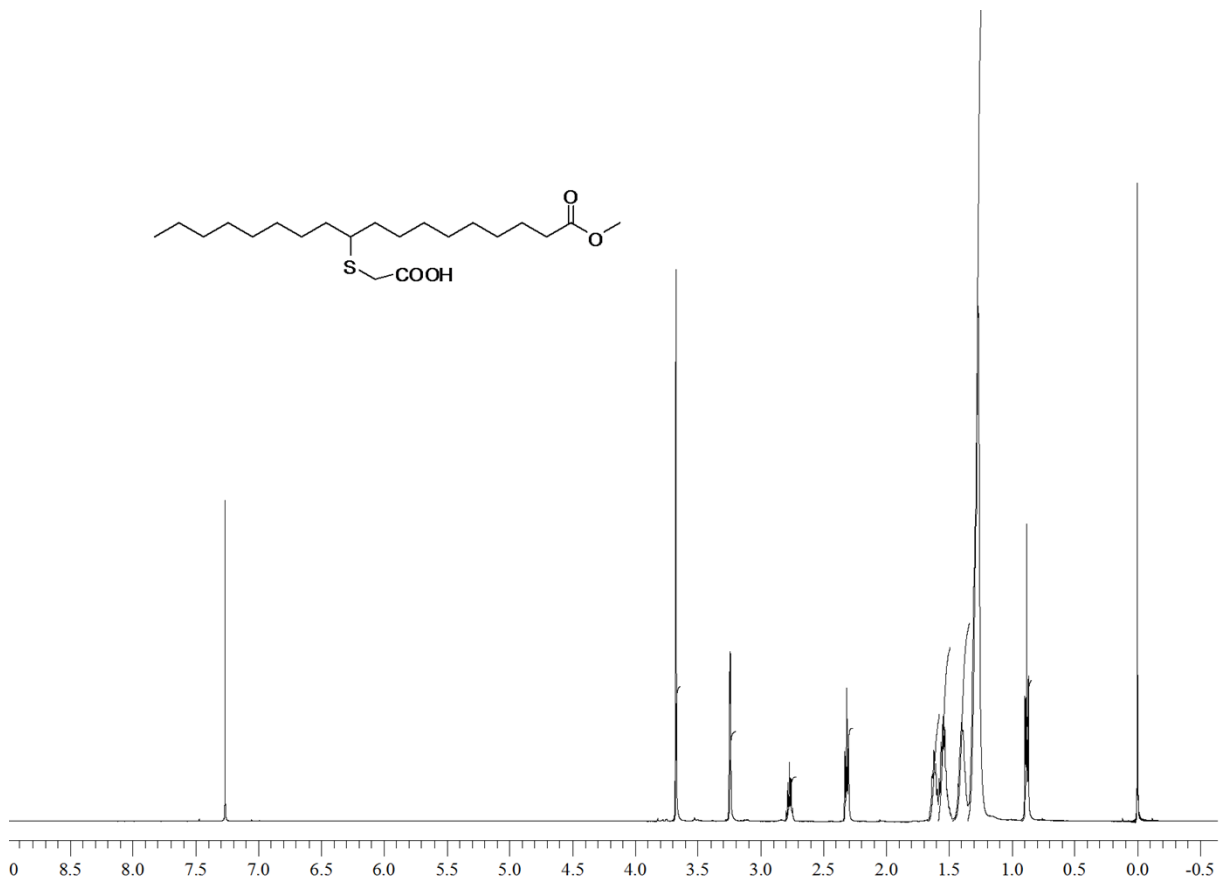

**SI-1:** <sup>1</sup>H-NMR Spectrums of 2-(18-methoxy-18-oxooctadecan-9-ylthio) acetic acid from methyl oleate (2).

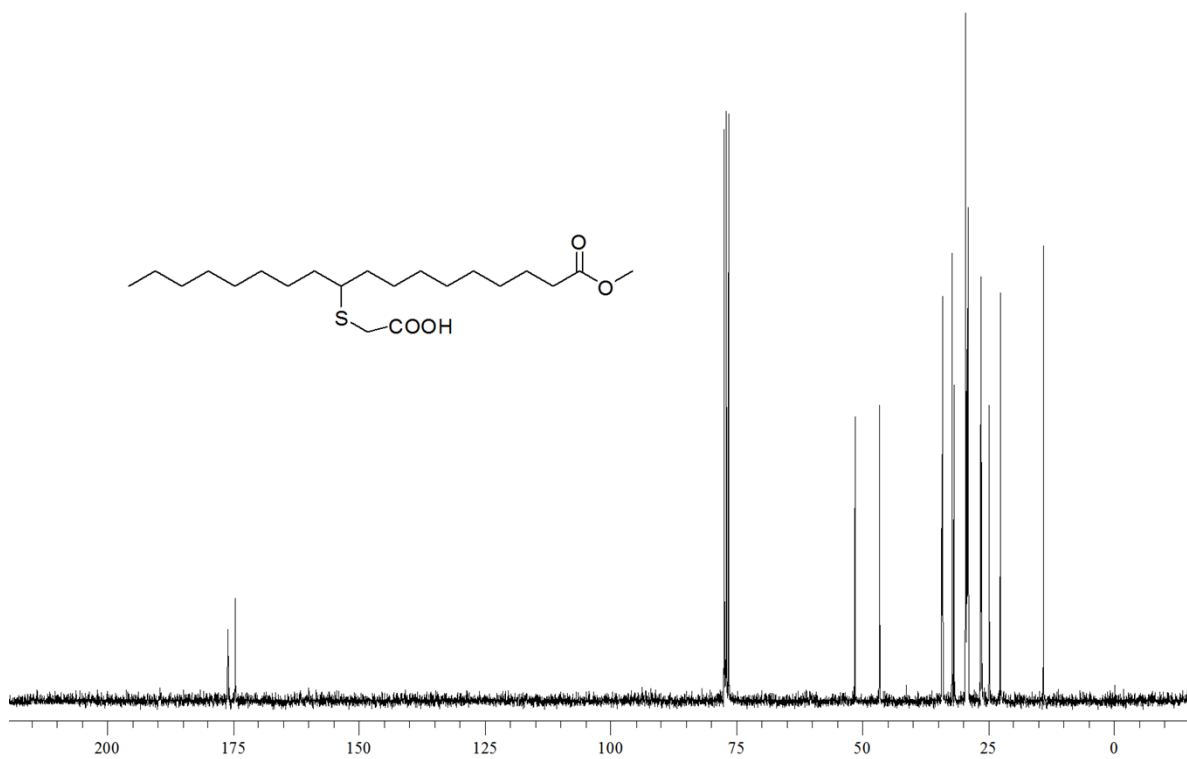

**SI-2:** <sup>13</sup>C-NMR Spectrums of 2-(18-methoxy-18-oxooctadecan-9-ylthio) acetic acid from methyl oleate (2).

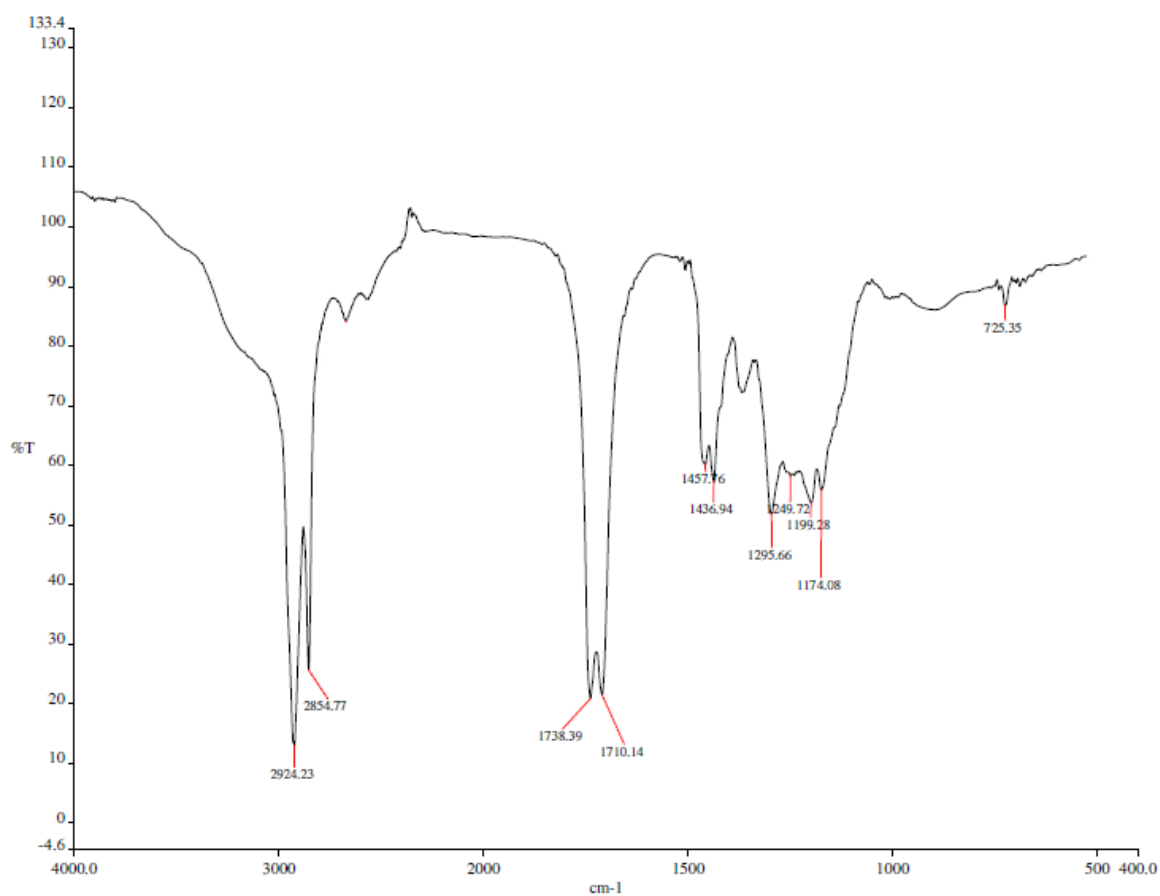

**SI-3:** FT-IR spectrum of the 2-(18-methoxy-18-oxooctadecan-9-ylthio) acetic acid from methyl oleate (2).

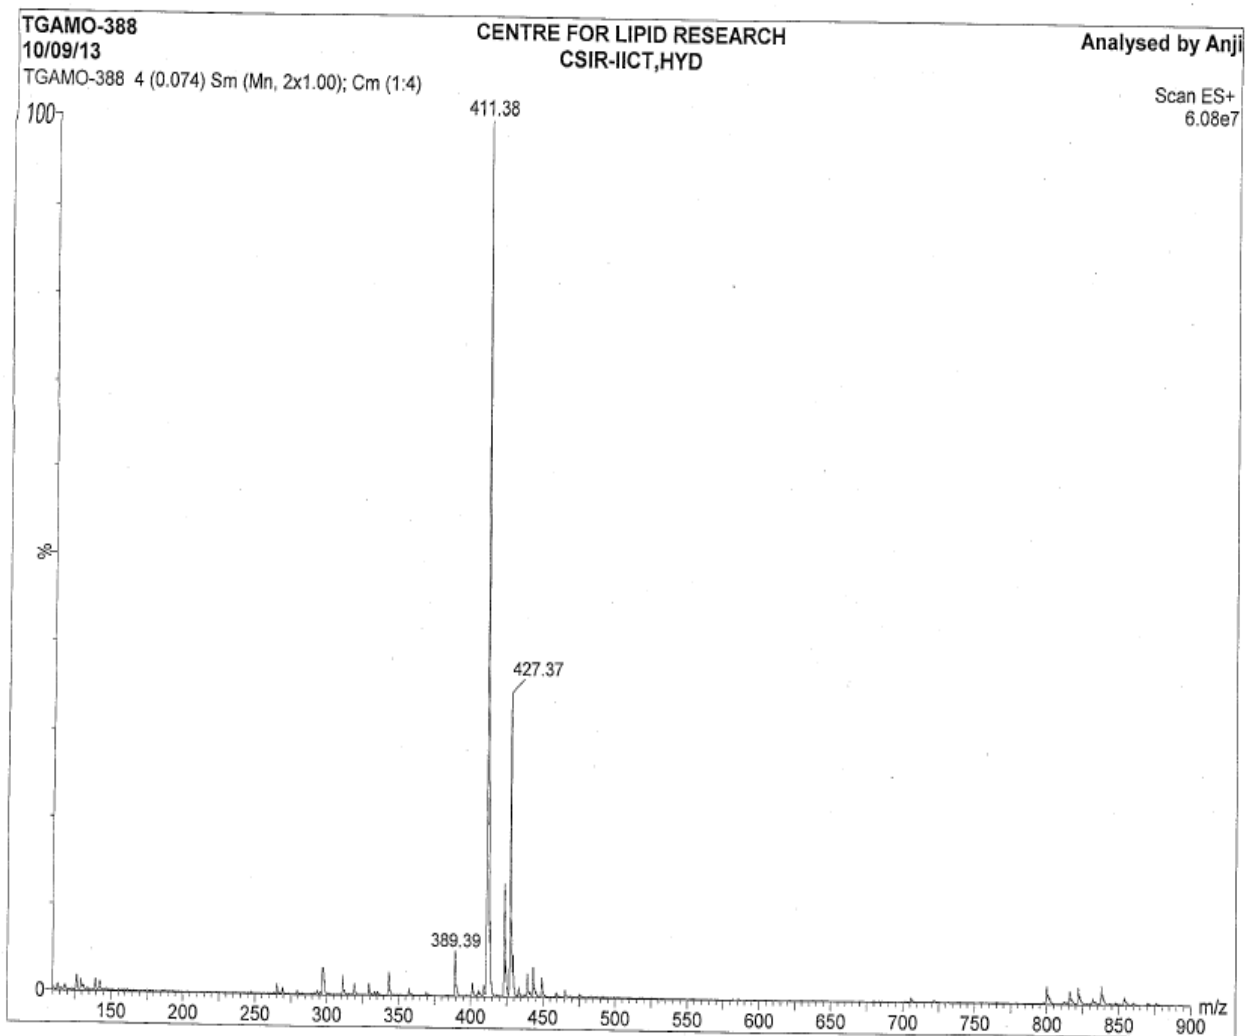

**SI-4:** ESI Mass spectrum of the 2-(18-methoxy-18-oxooctadecan-9-ylthio) acetic acid from methyl oleate (2).

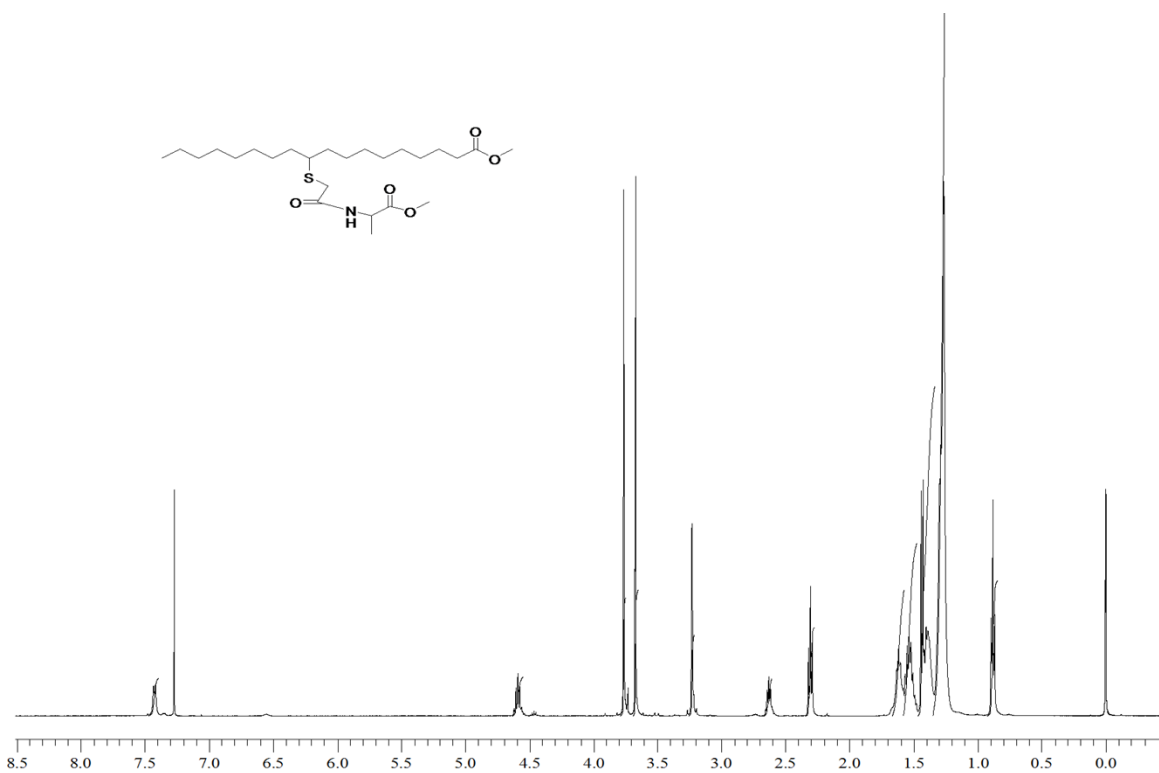

**SI-5:**  $^1\text{H-NMR}$  Spectrums of Methyl 10-(2-(1-methoxy-1-oxopropan-2-ylamino)-2-oxoethylthio) octadecanoate (3b).

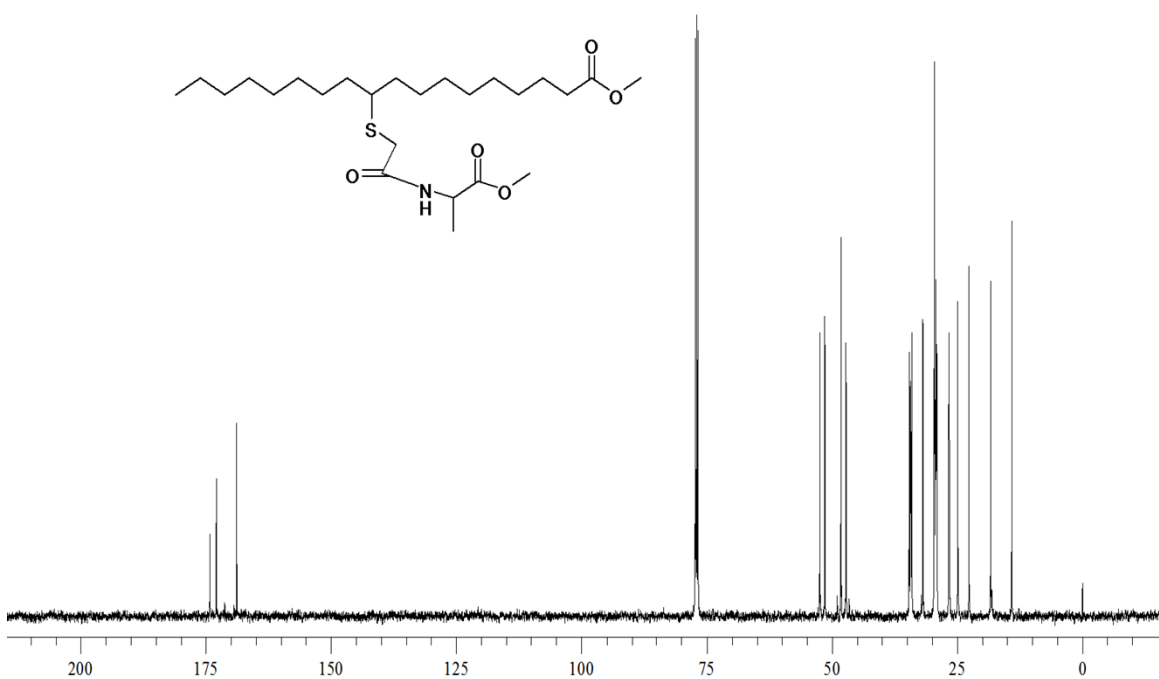

**SI-6:**  $^{13}\text{C}$ -NMR Spectrums of Methyl 10-(2-(1-methoxy-1-oxopropan-2-ylamino)-2-oxoethylthio) octadecanoate (3b).

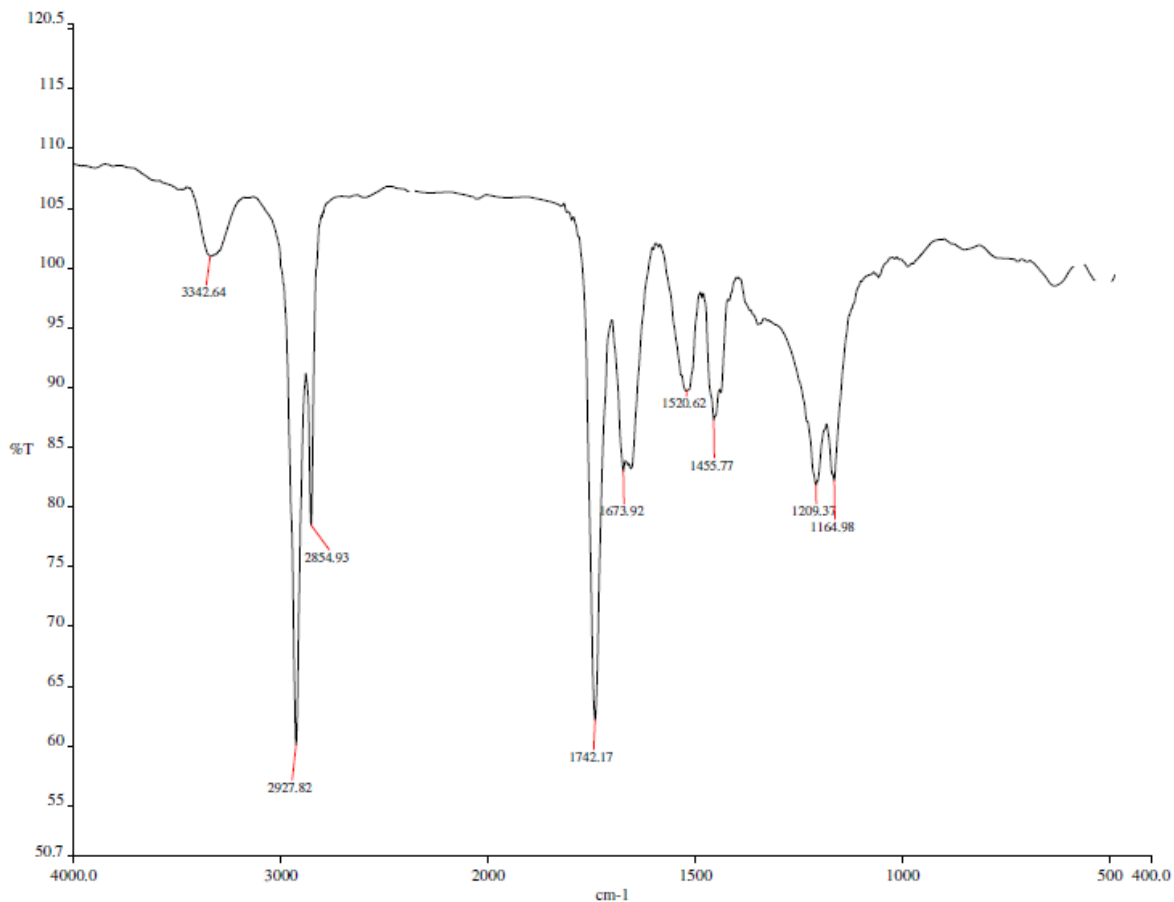

**SI-7:** FT-IR Spectrums of Methyl 10-(2-(1-methoxy-1-oxopropan-2-ylamino)-2-oxoethylthio) octadecanoate (3b).

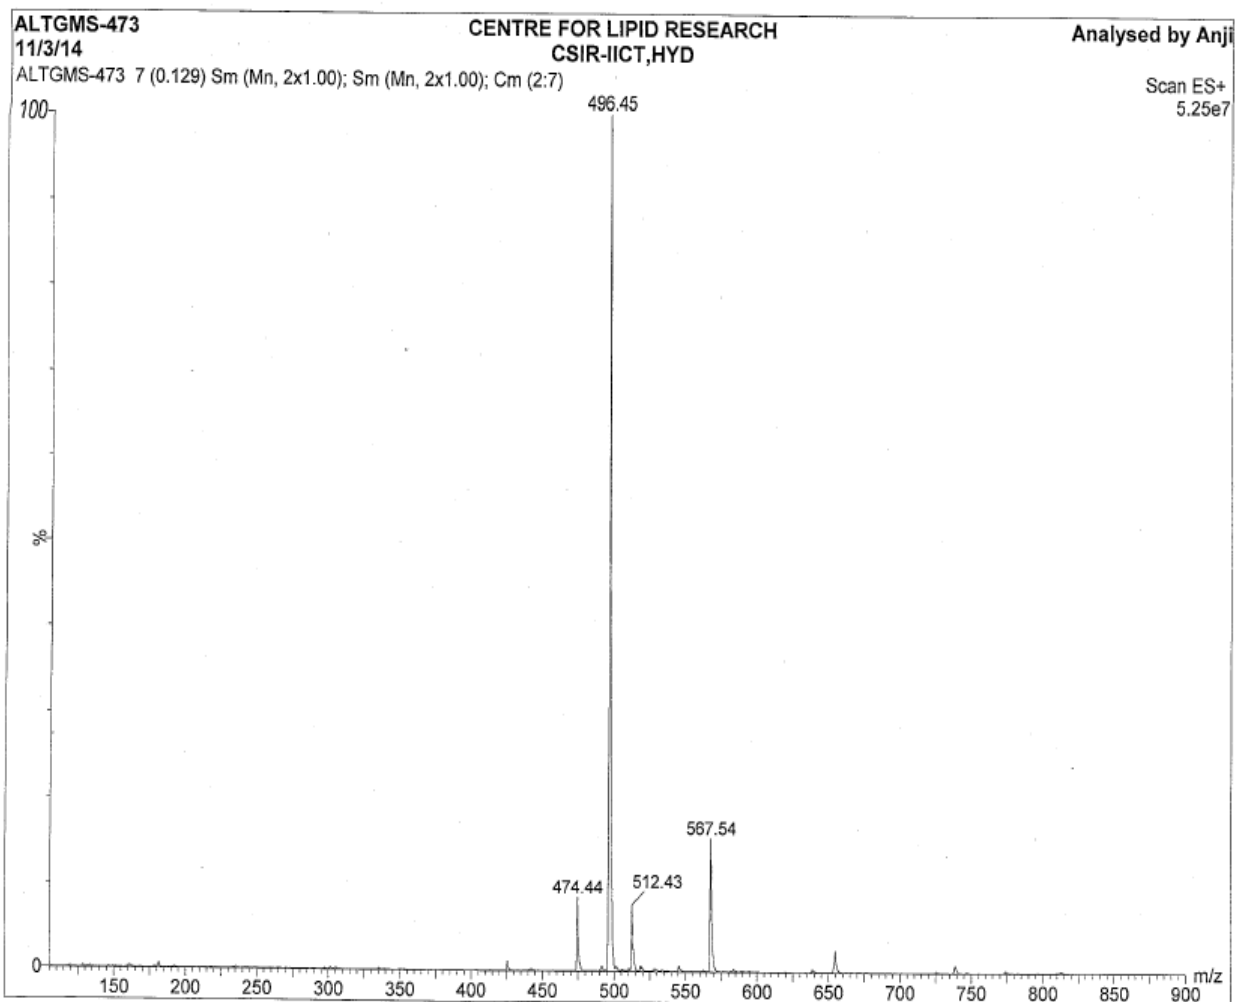

**SI-8:** ESI Mass Spectrums of Methyl 10-(2-(1-methoxy-1-oxopropan-2-ylamino)-2-oxoethylthio) octadecanoate (3b).



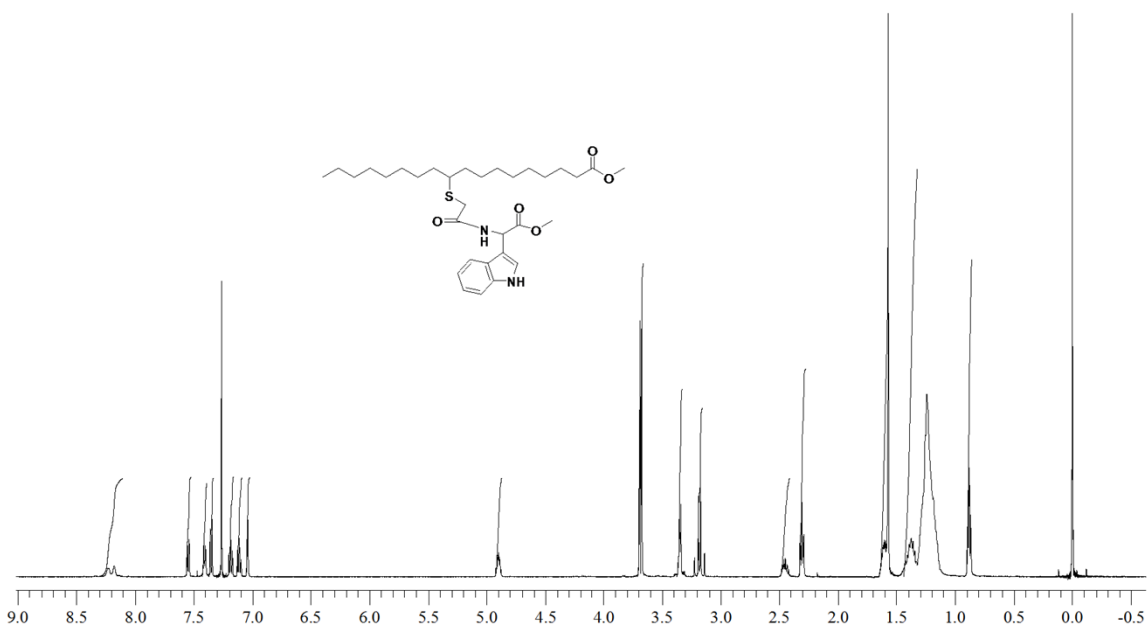

**SI-9:**  $^1\text{H}$ -NMR Spectrums of Methyl 10-(2-(3-isoindol-1-yl)-1-methoxy-1-oxopropan-2-ylamino)-2-oxoethylthio) octadecanoate (3f).

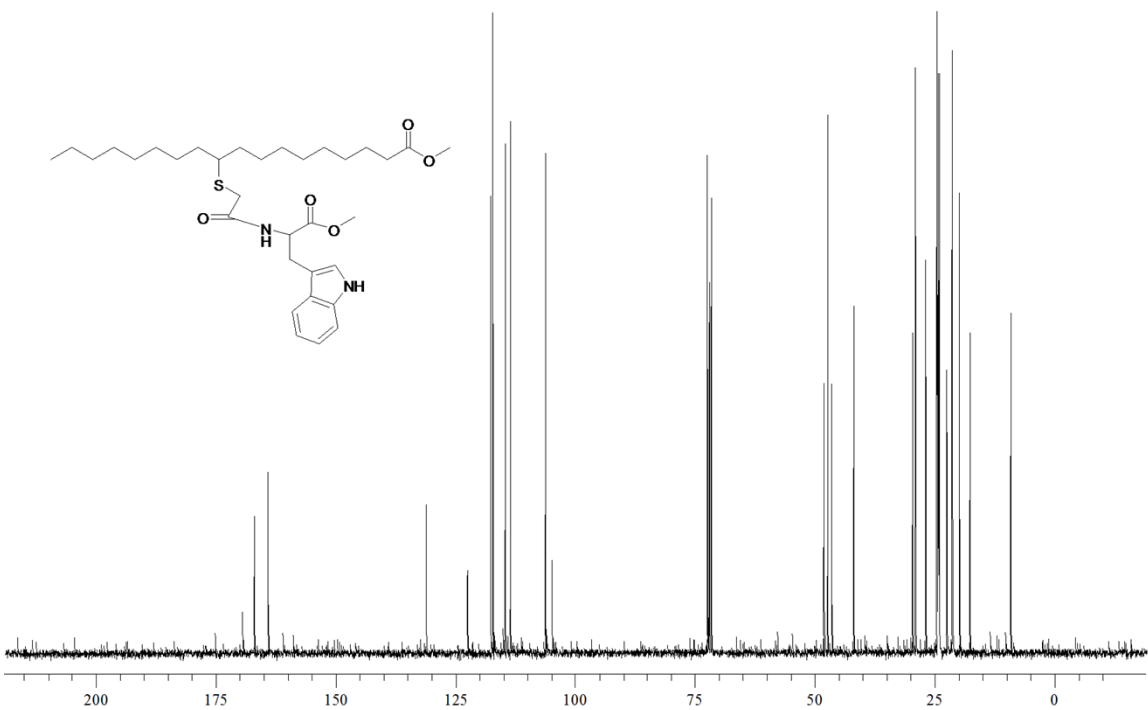

**SI-10:**  $^{13}\text{C}$ -NMR Spectrums of Methyl 10-(2-(3-isoindol-1-yl)-1-methoxy-1-oxopropan-2-ylamino)-2-oxoethylthio) octadecanoate (3f).

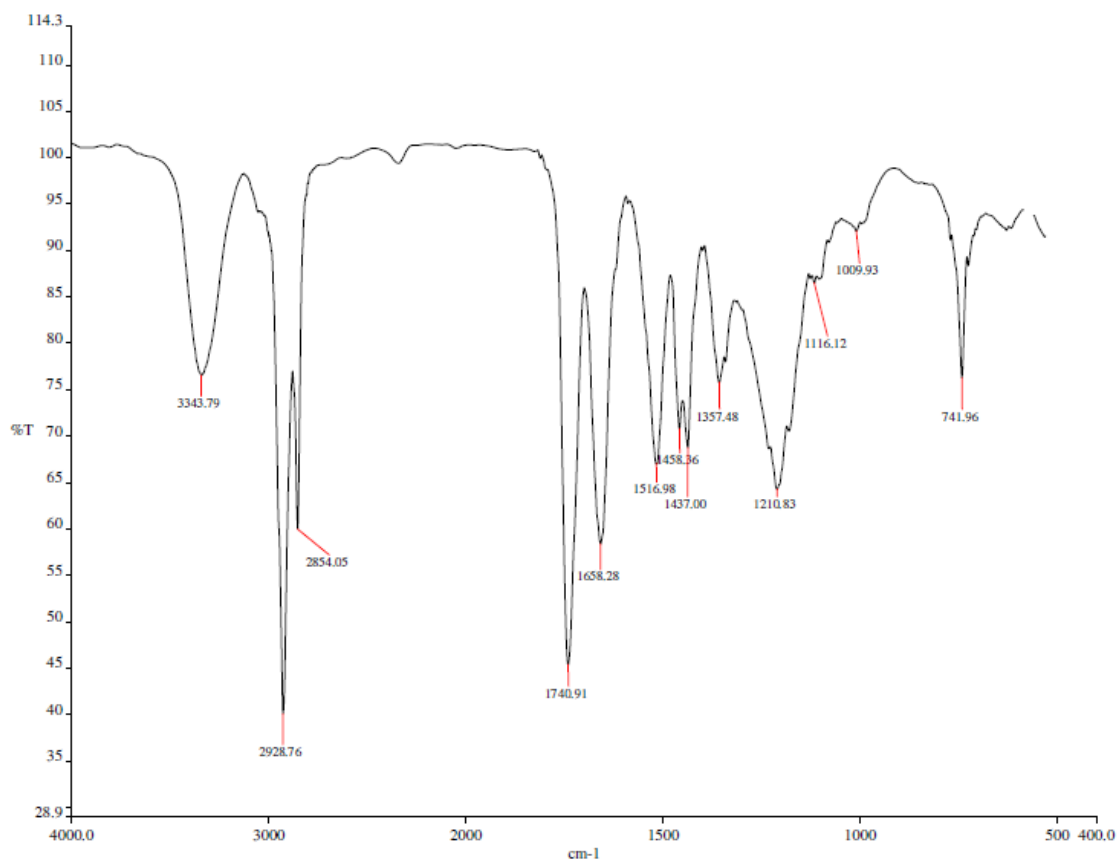

**SI-11:** FT-IR Spectrums of Methyl 10-(2-(3-isoindol-1-yl)-1-methoxy-1-oxopropan-2-ylamino)-2-oxoethylthio) octadecanoate (3f).

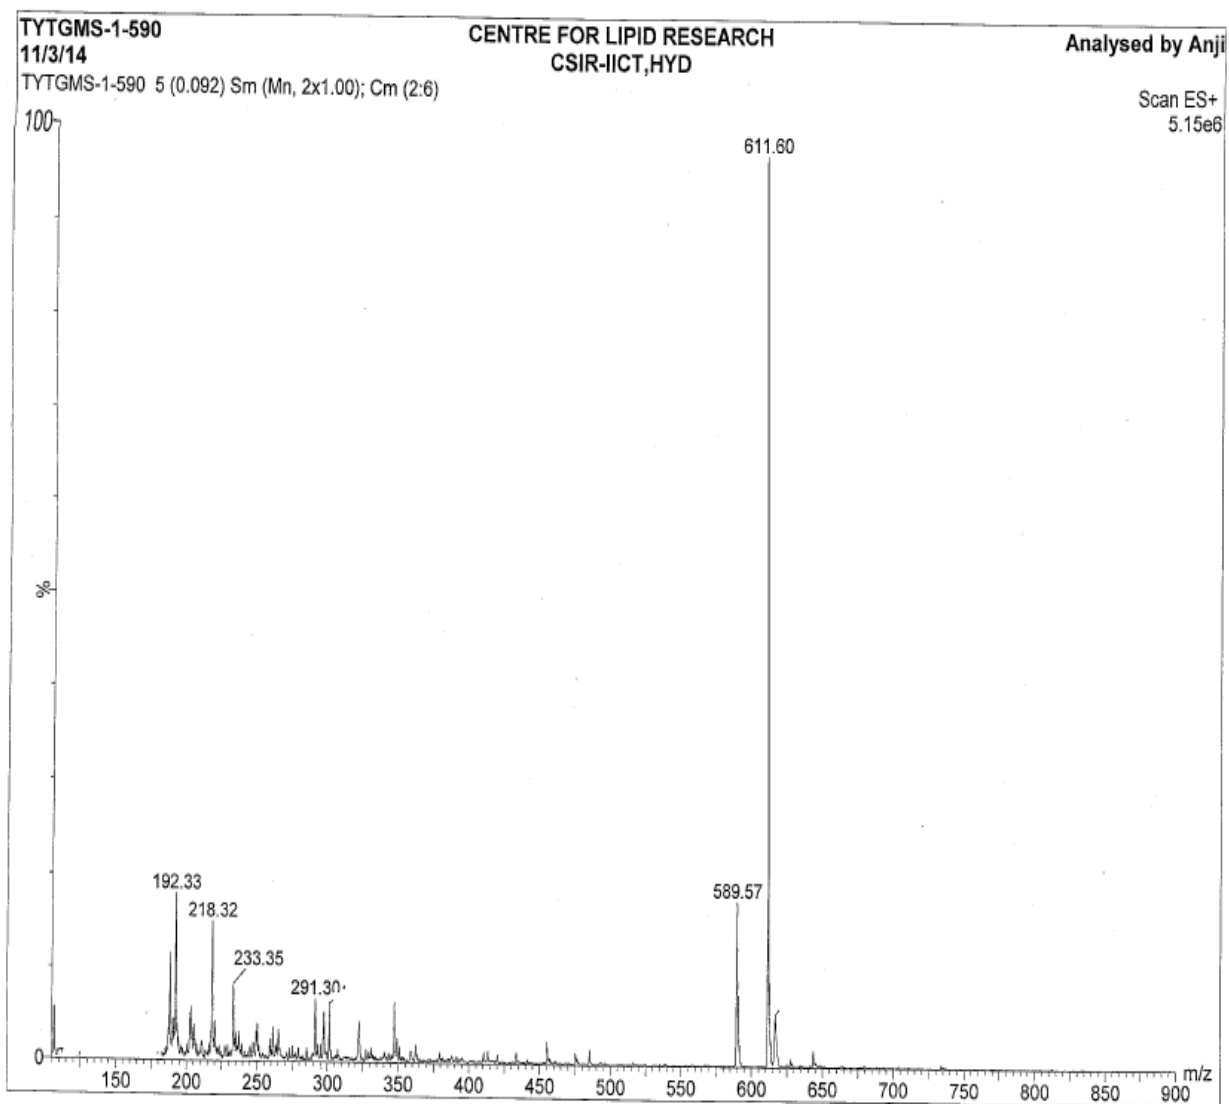

**SI-12:** ESI Mass Spectrums of Methyl 10-(2-(3-isoinol-1-yl)-1-methoxy-1-oxopropan-2-ylamino)-2-oxoethylthio) octadecanoate (3f).
